# Supplementary material for: Laser-synthesized ligand-free Au nanoparticles for contrast agent applications in computed tomography and magnetic resonance imaging
Source: Royal Society of Chemistry journal article supplement (doi:10.1039/c6tb01162d), 2016-01-01
Supplement: c6tb01162d1.pdf [file c6tb01162d1.pdf]

## Supporting Information

### Laser-synthesized Ligand-Free Au Nanoparticles for Contrast Agent Applications in Computed Tomography and Magnetic Resonance Imaging

*Teresa Simao,<sup>1</sup> Pascale Chevallier,<sup>2,3</sup> Jean Lagueux,<sup>2</sup> Marie-France Côté,<sup>2</sup> Christoph Rehbock,<sup>4</sup>  
Stephan Barcikowski,<sup>4</sup> Marc-André Fortin,<sup>\*2, 3, 5</sup> Daniel Guay<sup>\*1</sup>*

<sup>1</sup> Institut National de la Recherche Scientifique, Centre Énergie Matériaux Télécommunications  
1650 Boulevard Lionel-Boulet, Varennes (QC), J3X 1S2, Canada; <sup>2</sup> Centre de recherche du Centre  
hospitalier universitaire de Québec (CR-CHUQ), Axe Médecine Régénératrice, Quebec City (QC),  
G1L 3L5, Canada; <sup>3</sup> Centre de recherche sur les matériaux avancés (CERMA), Université Laval,  
Quebec City (QC), G1V 0A6, Canada; <sup>4</sup> Technical Chemistry I, University of Duisburg-Essen and  
Center for NanoIntegration Duisburg-Essen CENIDE, Universitaetsstrasse 7, 45141 Essen,  
Germany; <sup>5</sup> Département de génie des mines, de la métallurgie et des matériaux, Université Laval,  
Quebec City (QC), G1V 0A6, Canada

\*To whom correspondence should be addressed:

marc-andre.fortin@gmn.ulaval.ca

guay@emt.inrs.ca

#### **List of contents:**

1. Materials and Methods
  - a. Description of *in vivo* dual imaging by CT and MR of PC3 CAM tumors – p. 2
2. Results
  - a. Intensity-weighted average hydrodynamic diameter and polydispersity index  
values of Au NPs (Table S1) – p. 3
  - b. <sup>1</sup>H-NMR relaxometry analysis of Au NPs@PEG-Mn<sup>2+</sup> (Figure S1) – p. 4
  - c. Dynamic contrast enhancement CT study with Aurovist<sup>TM</sup> (Figure S2) – p. 5

## 1. MATERIALS AND METHODS

### Description of *in vivo* dual imaging by CT and MR of PC3 CAM tumors:

Briefly, fertilized chicken eggs purchased from Couvoirs Victoriaville (Victoriaville, Quebec, Canada) were incubated for ten days in a Pro-FI egg incubator fitted with an automatic egg turner before being transferred to a Roll-X static incubator for the rest of the incubation time (incubators purchased from Lyon Electric, Chula Vista, San Diego, CA). The eggs were kept at 37° C in a 60% humidity atmosphere for the full incubation period. On Day 10, a hole was gently drilled on the side of the egg and negative pressure was applied to create a new air sac. A window was opened on this new air sac and was covered with transparent adhesive tape to prevent contamination. A freshly-prepared cell suspension (40  $\mu$ L) of PC3 ( $4 \times 10^6$  cells/egg) cells was applied directly onto the newly-exposed CAM tissue through the window.

On Day 16, the embryos were submitted to low temperature conditions (40 min at 4° C) to minimize motion. 2  $\mu$ L of Au NPs@PEG-Mn<sup>2+</sup> in nanopure water (65.1 mM Au/ 1.2 mM Mn<sup>2+</sup>) were then directly injected into the tumor (30G-needle; Hamilton 1710-100  $\mu$ L syringe; Ultra Micropump III injector; Micro 4 Controller from World Precision Instruments Inc., Sarasota, FL). One (1) implanted egg was MR-scanned before injection of Au NPs@PEG-Mn<sup>2+</sup> NPs to serve as a control. Subsequently, the same egg and three (3) other implanted eggs were scanned within 10 to 15 minutes and at 18 hours following injection. For the MR scan (1.0 T MRI, M2M, Aspect Imaging, Netanya, Israel), each egg was placed in a 60 mm coil, and a  $T_1$ -weighted echo sequence was performed twice to minimize motion artifacts (TE 18.3 ms, TR 1282.7 ms, dwell time 25  $\mu$ s, field of view 60 mm, flip angle 90°, slice thickness 0.7 mm, interslice 0.1 mm, matrix 400x320, number of excitations 2, acquisition time 6.5 min). After the MRI scan, the eggs were kept at 37° C in a 60% humidity atmosphere for 1 hour 20 min and incubated at 4° C for 40 minutes before the

CT imaging study (once again to minimize motion). The CT scans were performed at 2 hours and 20 hours following injection. The eggs were scanned in a preclinical CT (eXplore Locus 80, GE Healthcare Technologies, Milwaukee, WI) at a peak voltage of 40 kVp and an x-ray tube current of 450  $\mu$ A. The detector exposure time was 90 ms at a detector binning of 4x4 for a voxel resolution of 89  $\mu$ m.

At the end of all imaging studies, the embryos were euthanized at 4° C followed by decapitation. CT image reconstruction and Hounsfield Unit (HU) calibration was performed using the Parallax Innovations Reconstruction tool from Parallax Innovations (Ilderton, ON, Canada). MRI and CT 3D images were generated using ImageJ software (version 1.47v, Wayne Rasband, National Institutes of Health, USA).

## 2. RESULTS

| Table S1.                   | Dynamic light scattering |     |
|-----------------------------|--------------------------|-----|
|                             | HD (nm)                  | PdI |
| Au NPs                      | 17.5±4.9                 | 0.3 |
| Au NPs@PEG                  | 40.9±9.8                 | 0.2 |
| Au NPs@PEG-DMSA-DTPA        | 34.1±6.2                 | 0.1 |
| Au NPs@PEG-Mn <sup>2+</sup> | 36.5±8.4                 | 0.2 |

**Table S1.** Intensity-weighted average hydrodynamic diameter (HD) and polydispersity index (PdI) values of Au NPs, at the end of each step of the functionalization procedure, measured by DLS.

**Figure S1:**

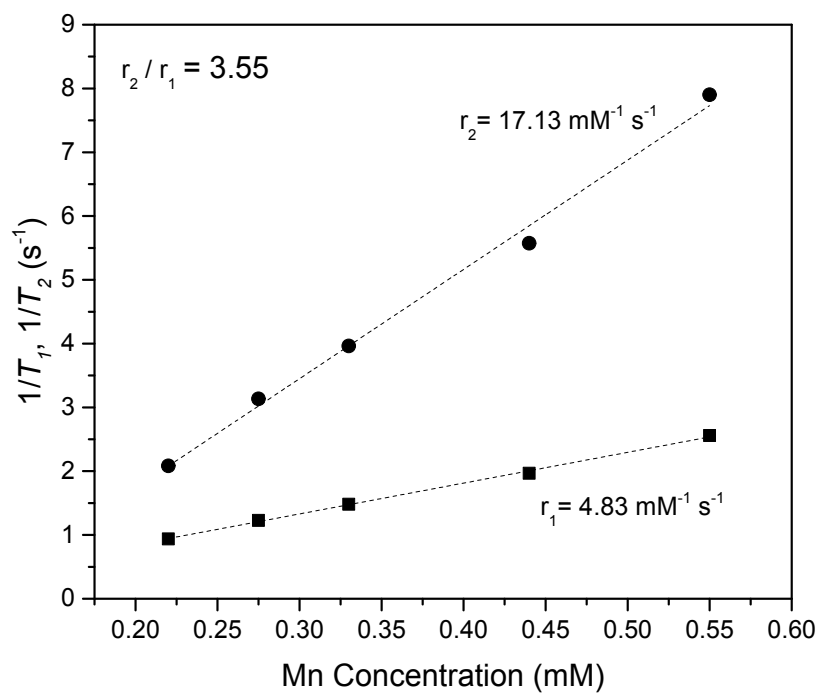

**Figure S1.**  $^1\text{H}$ -NMR relaxometry analysis of Au NPs@PEG- $\text{Mn}^{2+}$  performed at 37° C and 1.41 T.

**Figure S2:**

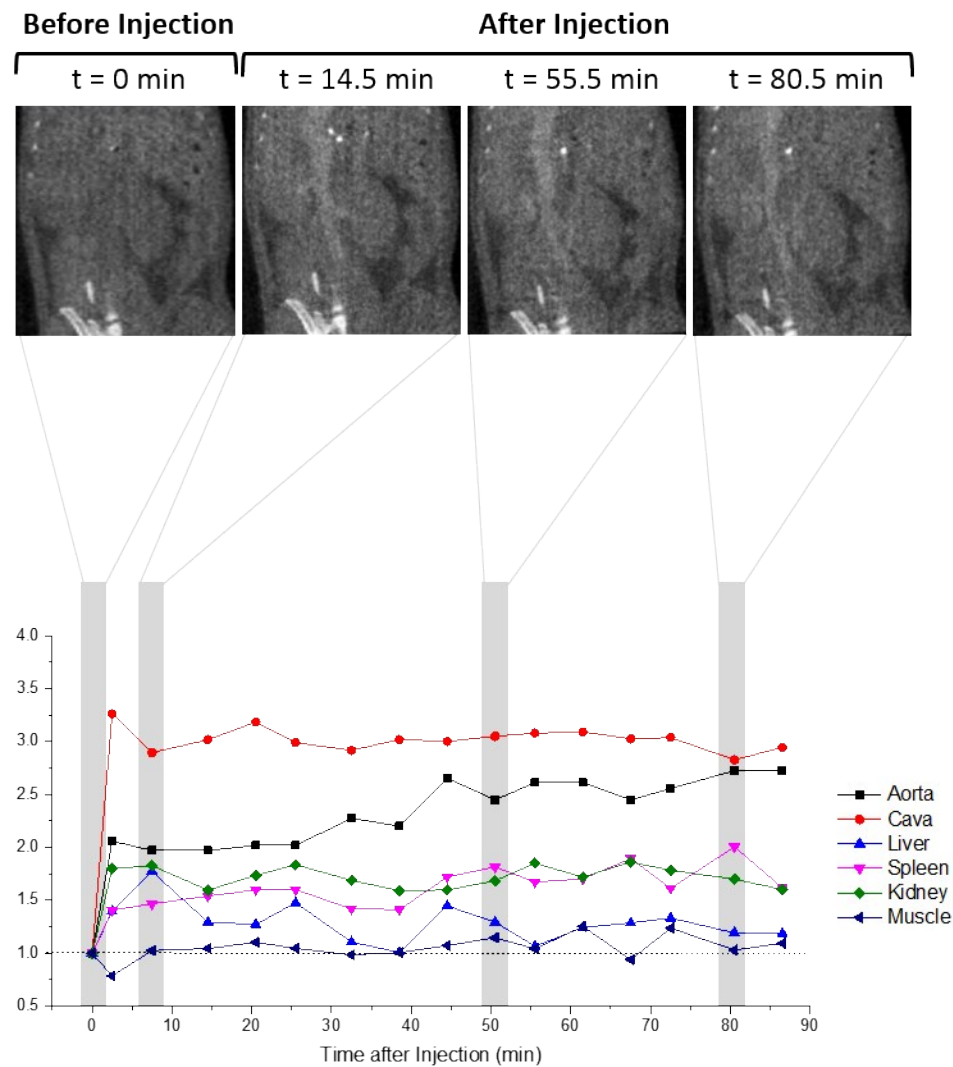

**Figure S2.** Dynamic contrast enhancement CT study of Aurovist™ using a healthy CD-1 mouse. Images show coronal sections of the abdominal region. The graph displays the contrast enhancement before (0 min), and at different time points after the injection.
